# Supplementary material for: EDTA derived graphene supported porous cobalt hexacyanoferrate nanospheres as a highly electroactive nanocomposite for hydrogen peroxide sensing
Source: Royal Society of Chemistry journal article supplement (doi:10.1039/d2cy00003b), 2022-01-01
Supplement: d2cy00003b1.pdf [file d2cy00003b1.pdf]

## EDTA derived Graphene supported Porous Cobalt Hexacyanoferrate nanospheres as a highly electroactive nanocomposite for Hydrogen Peroxide sensing

Ramu Banavath <sup>a, b, \*</sup>, Rohit Srivastava <sup>b</sup>, Parag Bhargava <sup>a\*</sup>

a-Department of Metallurgical and Materials Science, Indian Institute of Technology-Bombay, Mumbai, India, 400076

b-Department of Biosciences and Bioengineering, Indian Institute of Technology-Bombay, Mumbai, India, 400076

\*Corresponding author.

E-mail address: [ramubanavath@iitb.ac.in](mailto:ramubanavath@iitb.ac.in) (Ramu Banavath), [pbhargava@iitb.ac.in](mailto:pbhargava@iitb.ac.in) (Parag Bhargava)

Mailing address: IIT Bombay, Powai, Maharashtra, India, 400076

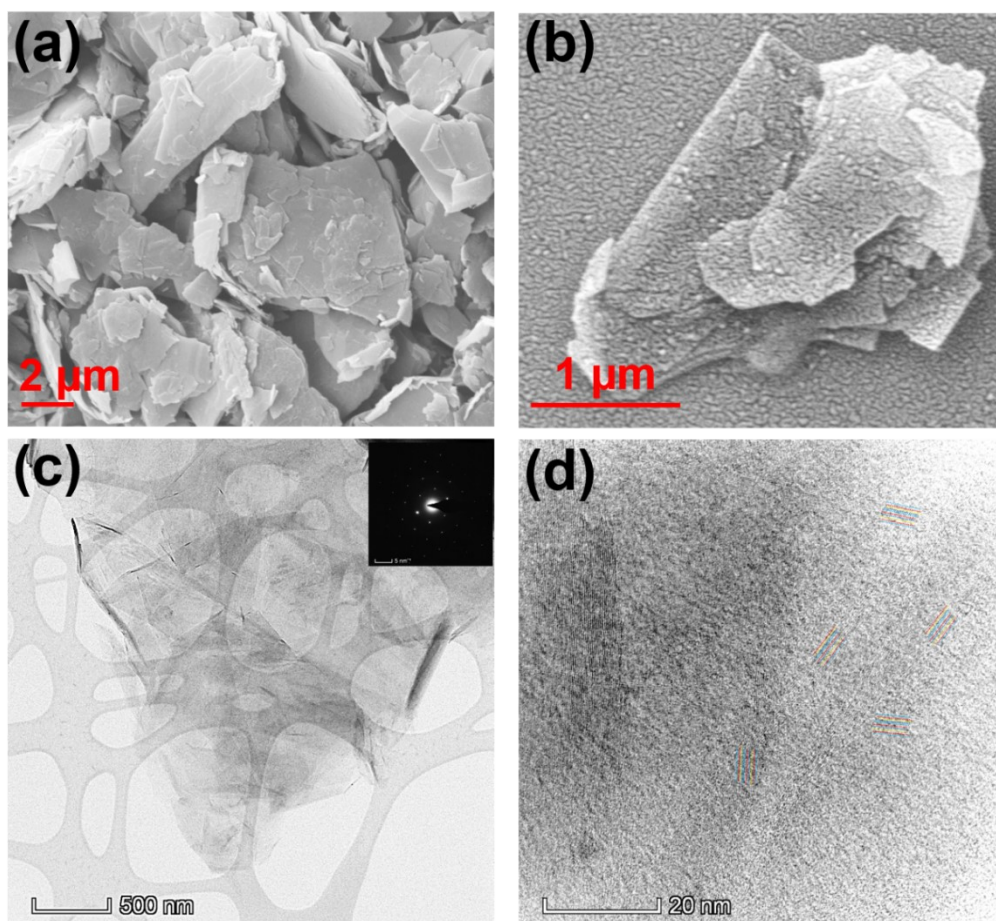

**Figure S 1:** - (a) FEG-SEM image of Natural Graphite, (b) FEG-SEM image of exfoliated graphene, (c, d) FEG-TEM images of exfoliated graphene.

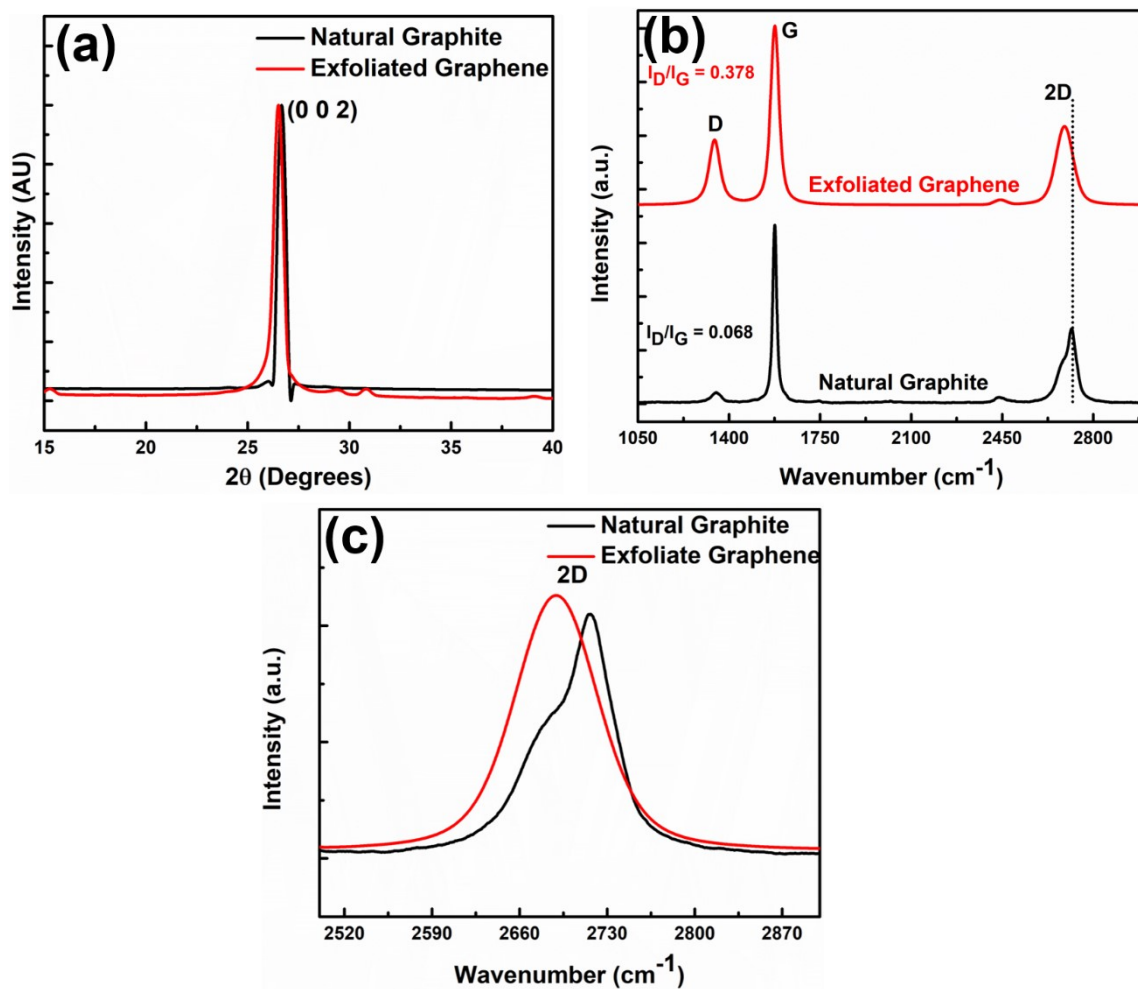

**Figure S 2:** - (a) X-ray diffractometry spectra comparison of exfoliated graphene with natural graphite, (b, c) Raman spectroscopy of exfoliated graphene and its comparison with natural graphite.

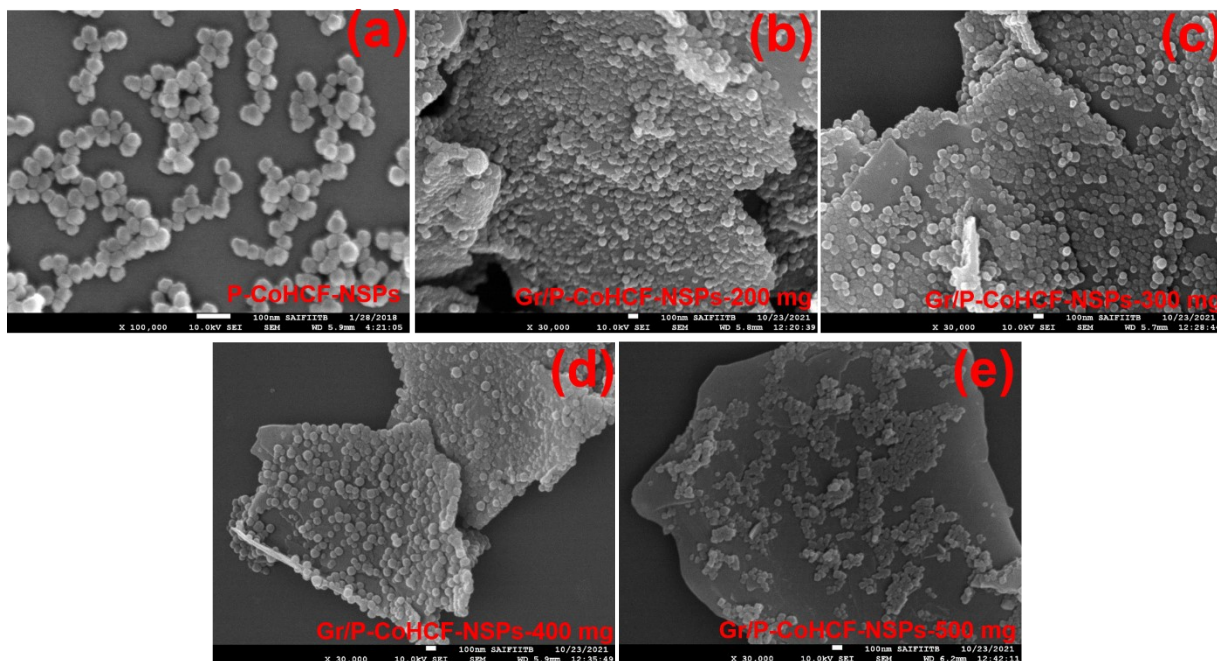

Figure S 3: - FEG-SEM images of P-CoHCF-NSPs and Gr/P-CoHCF-NSPs composites prepared at different concentrations of exfoliated graphene.

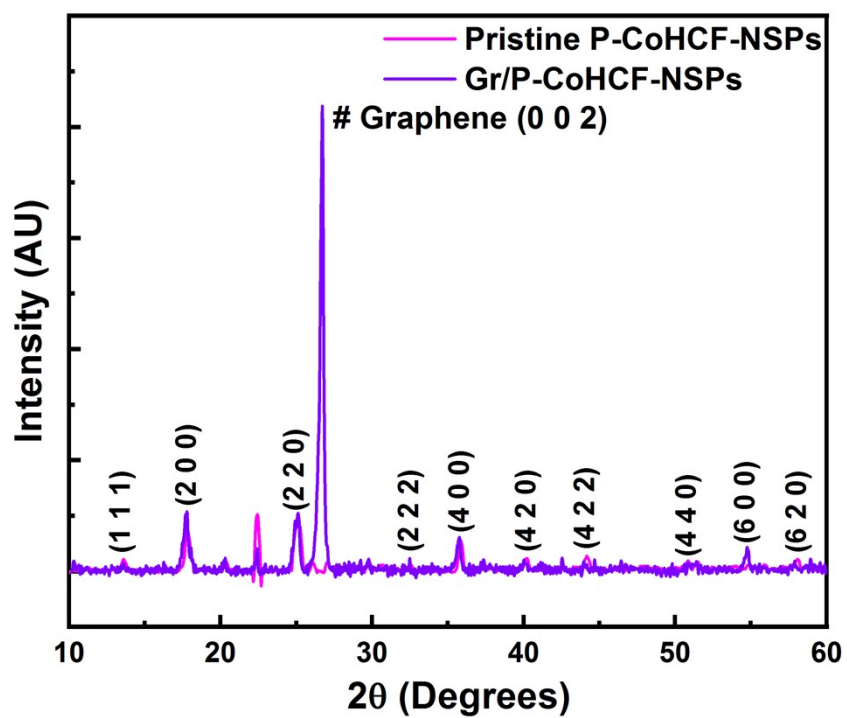

Figure S 4: - XRD peaks intensity comparison for Pristine P-CoHCF-NSPs and Gr/P-CoHCF-NSPs composite.



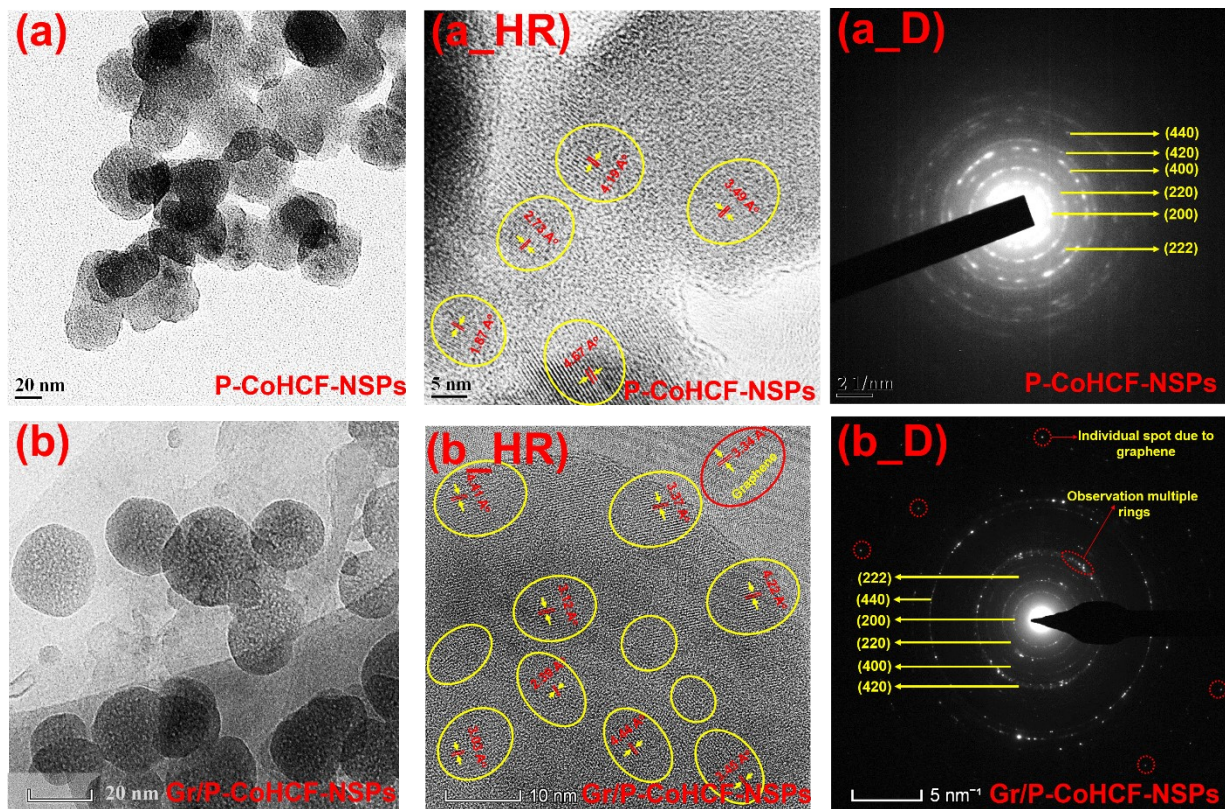

**Figure S 5:** - (a, a\_HR, a\_D) TEM images of P-CoHCF-NSPs, and (b, b\_HR, b\_D) TEM images of Gr/P-CoHCF-NSPs composite.

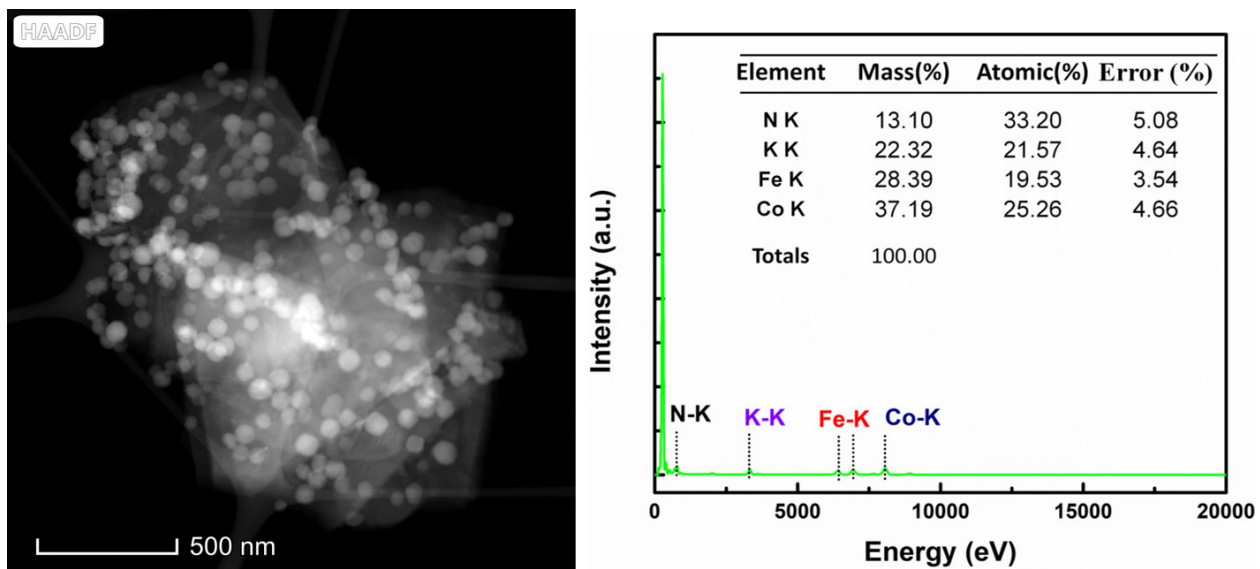

**Figure S 6:** - EDS spectra of Gr/P-CoHCF-NSPs found from HAADF-STEM elemental mapping.

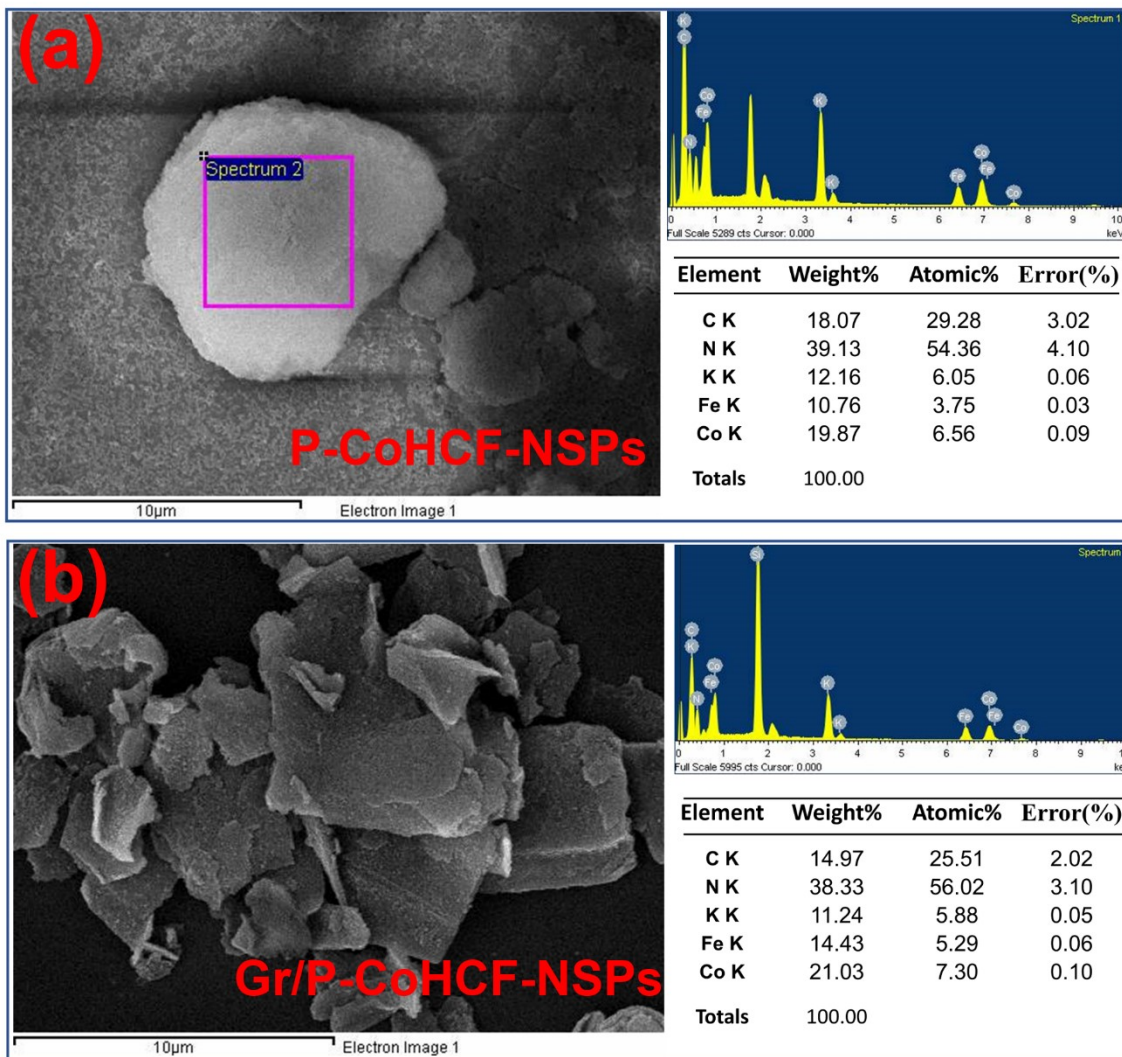

**Figure S 7:** - EDS of pristine P-CoHCF-NSPs and Gr/P-CoHCF-NSPs composite prepared with 400 mg graphene.

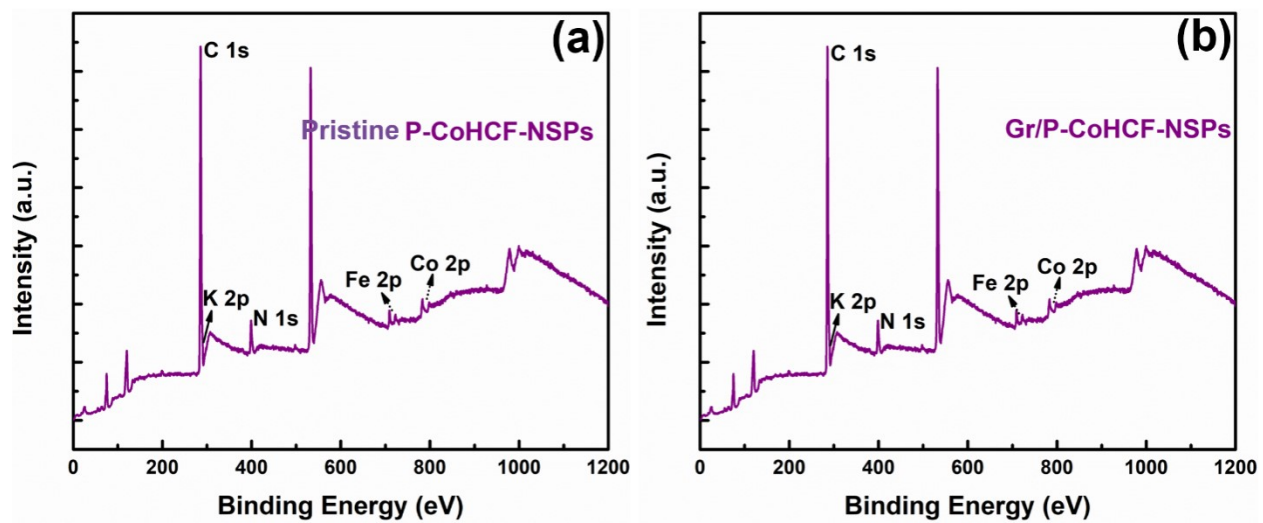

Figure S 8: - XPS wide spectra for pristine P-CoHCF-NSPs (a), and Gr/P-CoHCF-NSPs based composite.



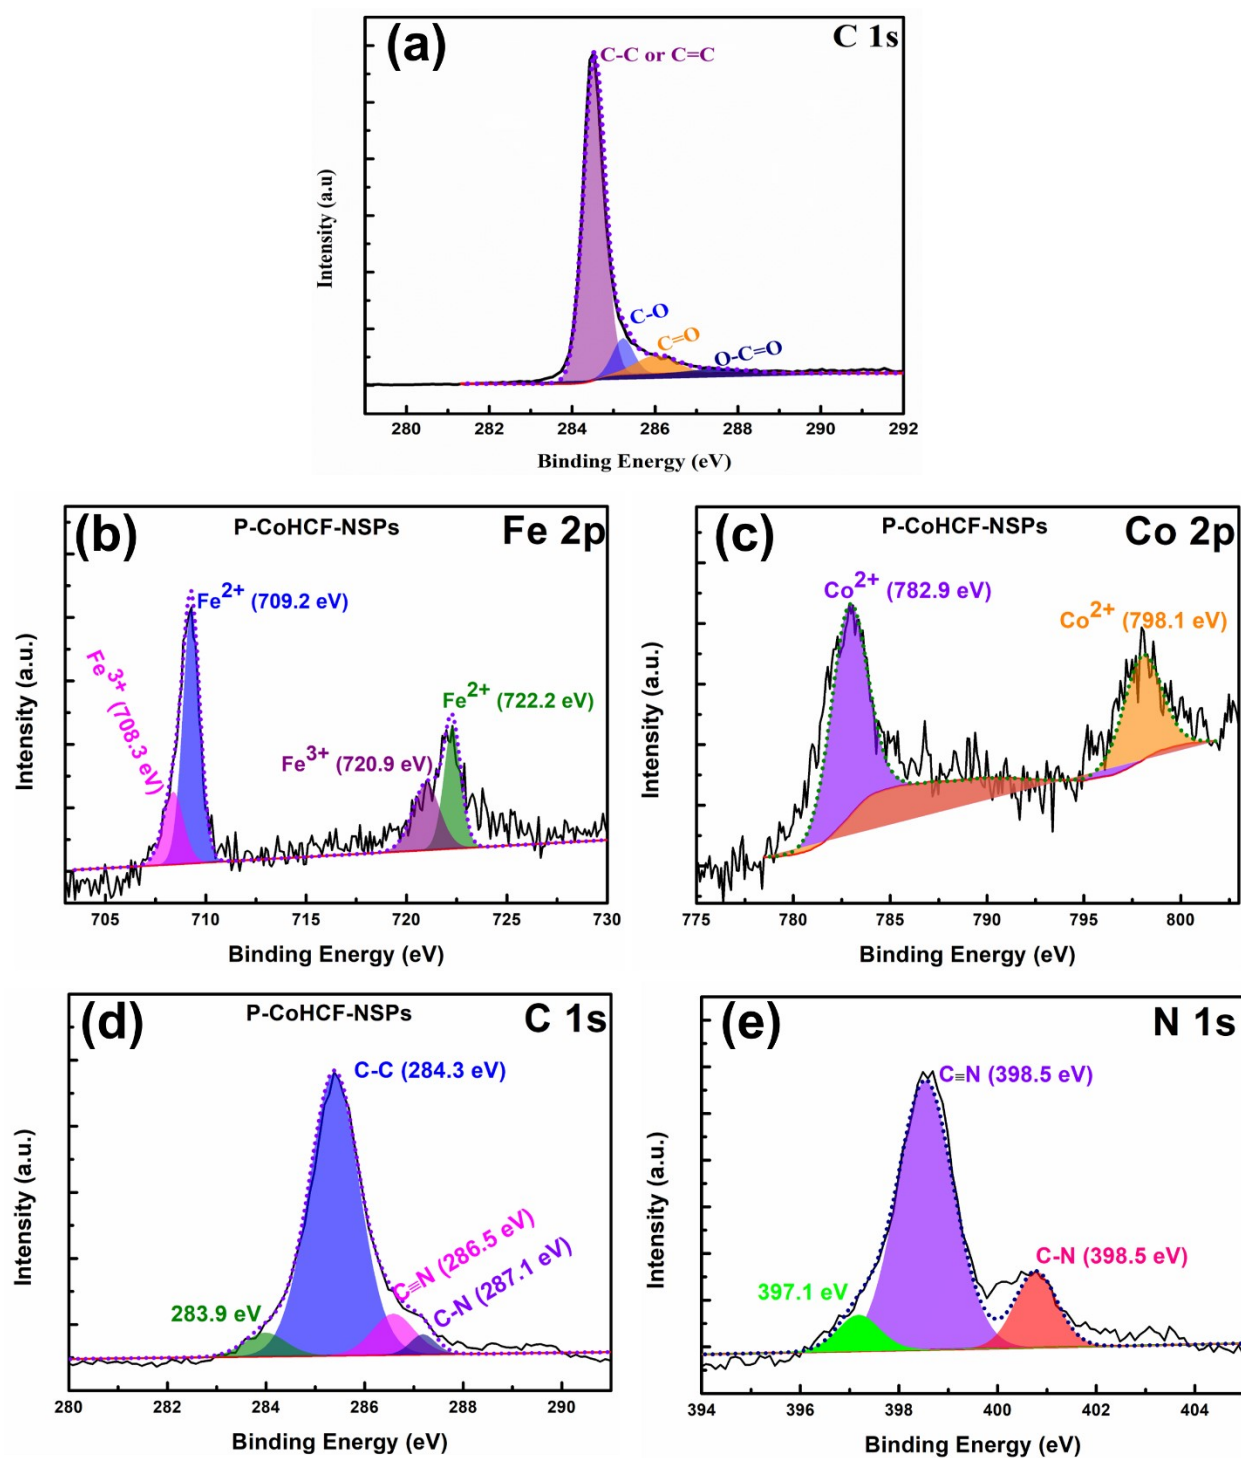

**Figure S 9:** - (a) XPS spectra of exfoliated graphene, (b, c, d, e) High-resolution XPS spectra of Fe, Co, C, and N of pristine P-CoHCF-NSPs.



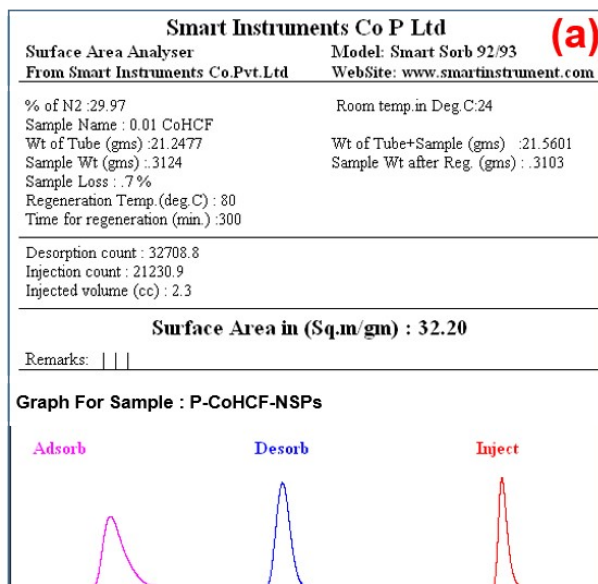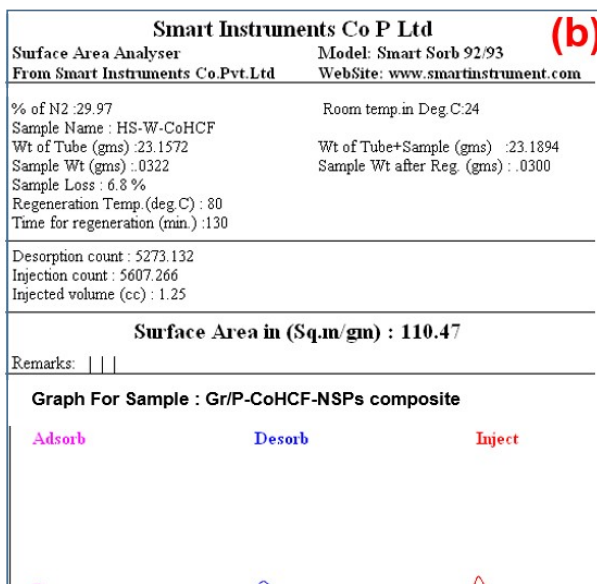

Figure S 10: - Specific surface area of P-CoHCF-NSPs and Gr/P-CoHCF-NSPs composite calculated by single point BET .

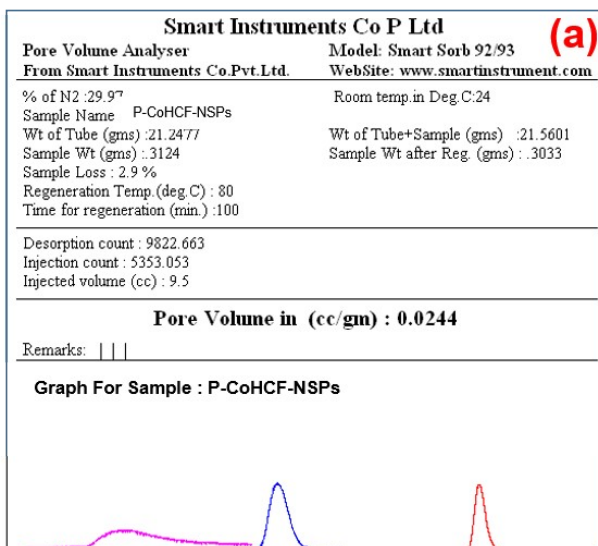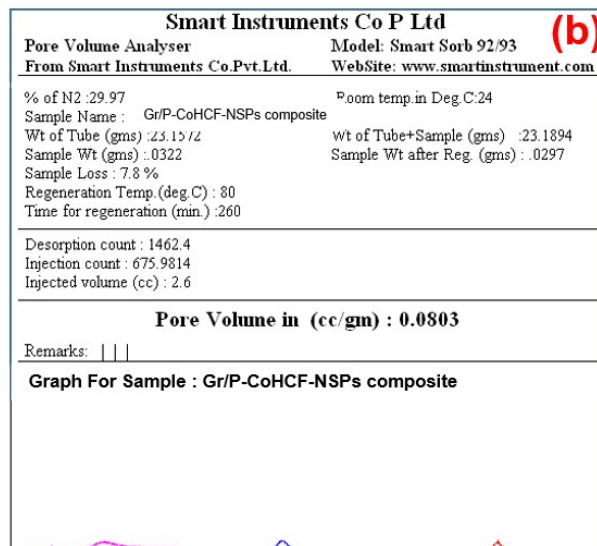

Figure S 11: - Pore volume of P-CoHCF-NSPs and Gr/P-CoHCF-NSPs composite calculated by single point BET .

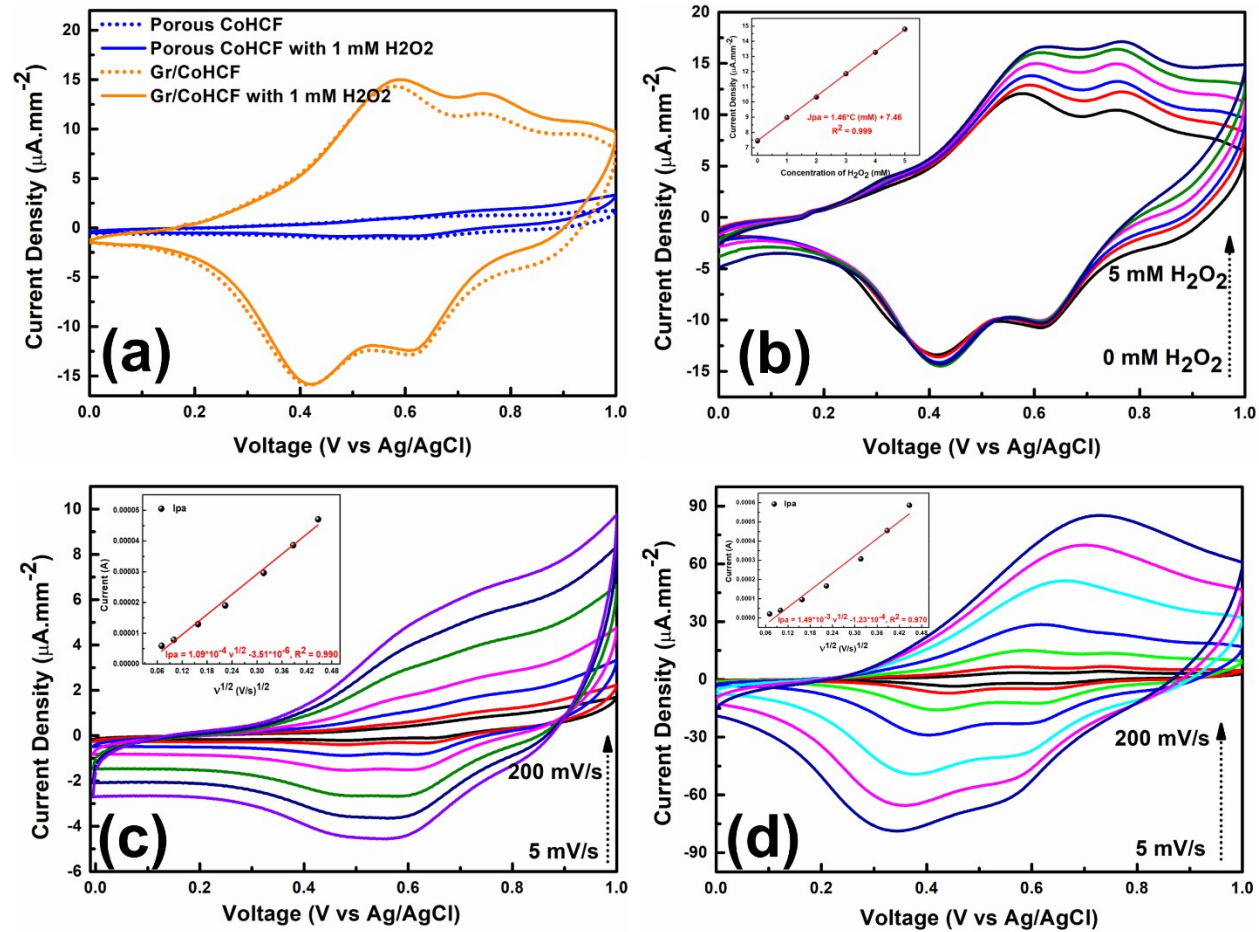

**Figure S 12:** - All CV characterizations of 27  $\mu\text{l}$  composite ink modified glassy carbon electrodes (a) CV comparison with pristine P-CoHCF-NSPs in 1 mM H<sub>2</sub>O<sub>2</sub>, (b) CV for different concentrations of H<sub>2</sub>O<sub>2</sub>, (c, d) CV scan rate comparison of composite with P-CoHCF-NSPs in 1 mM H<sub>2</sub>O<sub>2</sub> containing PBS.

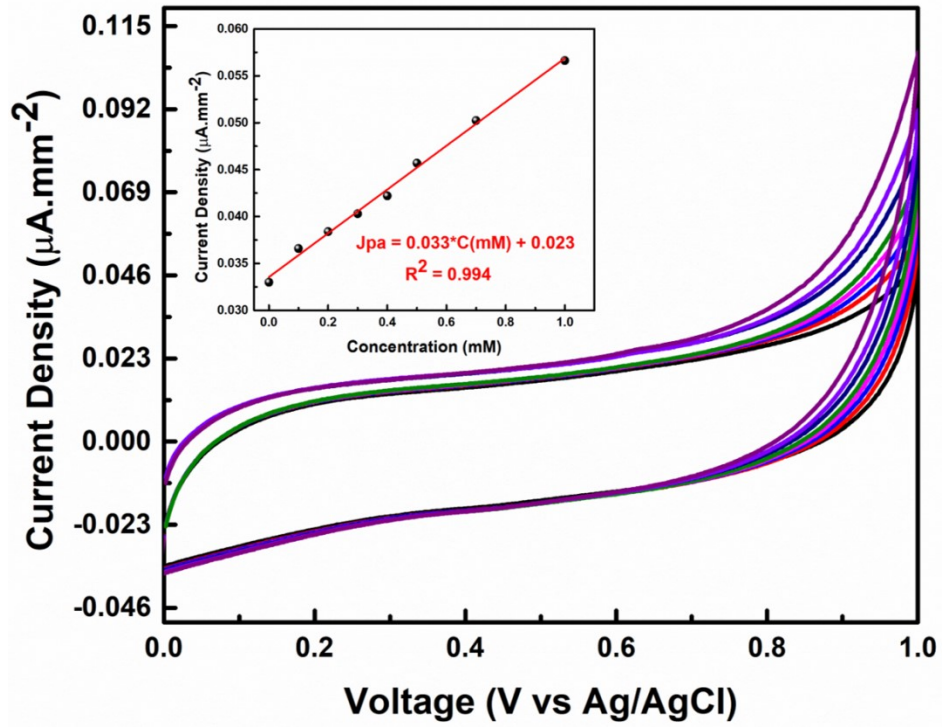

Figure S 13: - CV of blank GCE in the presence of different concentrations of H<sub>2</sub>O<sub>2</sub> at the SR of 25 mV/s.

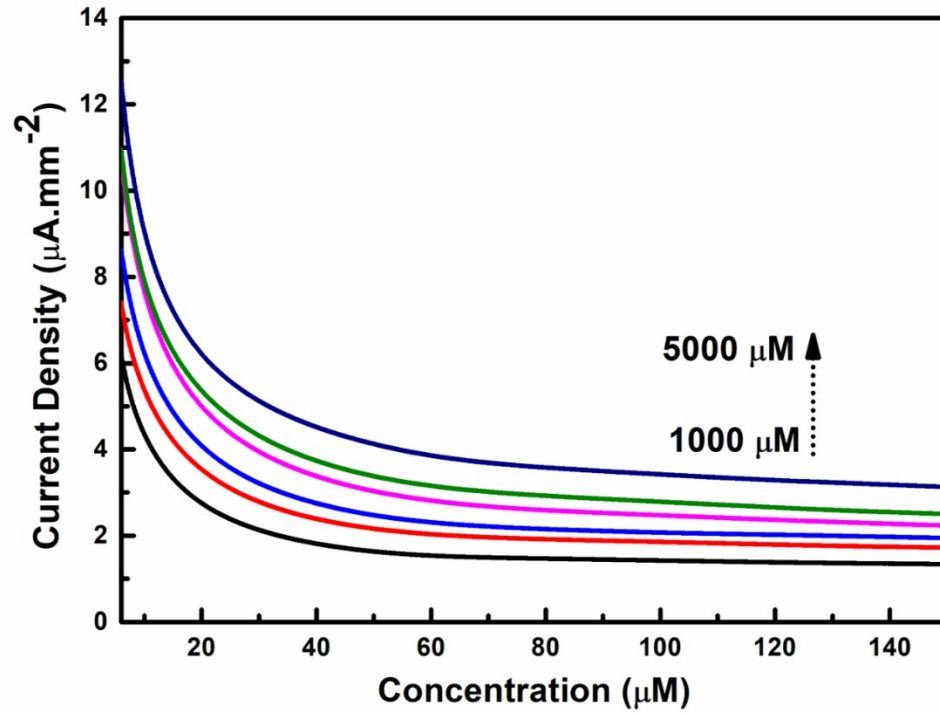

Figure S 14: - Chronoamperometry of Gr/P-CoHCF-NSPs composite based H<sub>2</sub>O<sub>2</sub> sensor for high concentrations of H<sub>2</sub>O<sub>2</sub>.



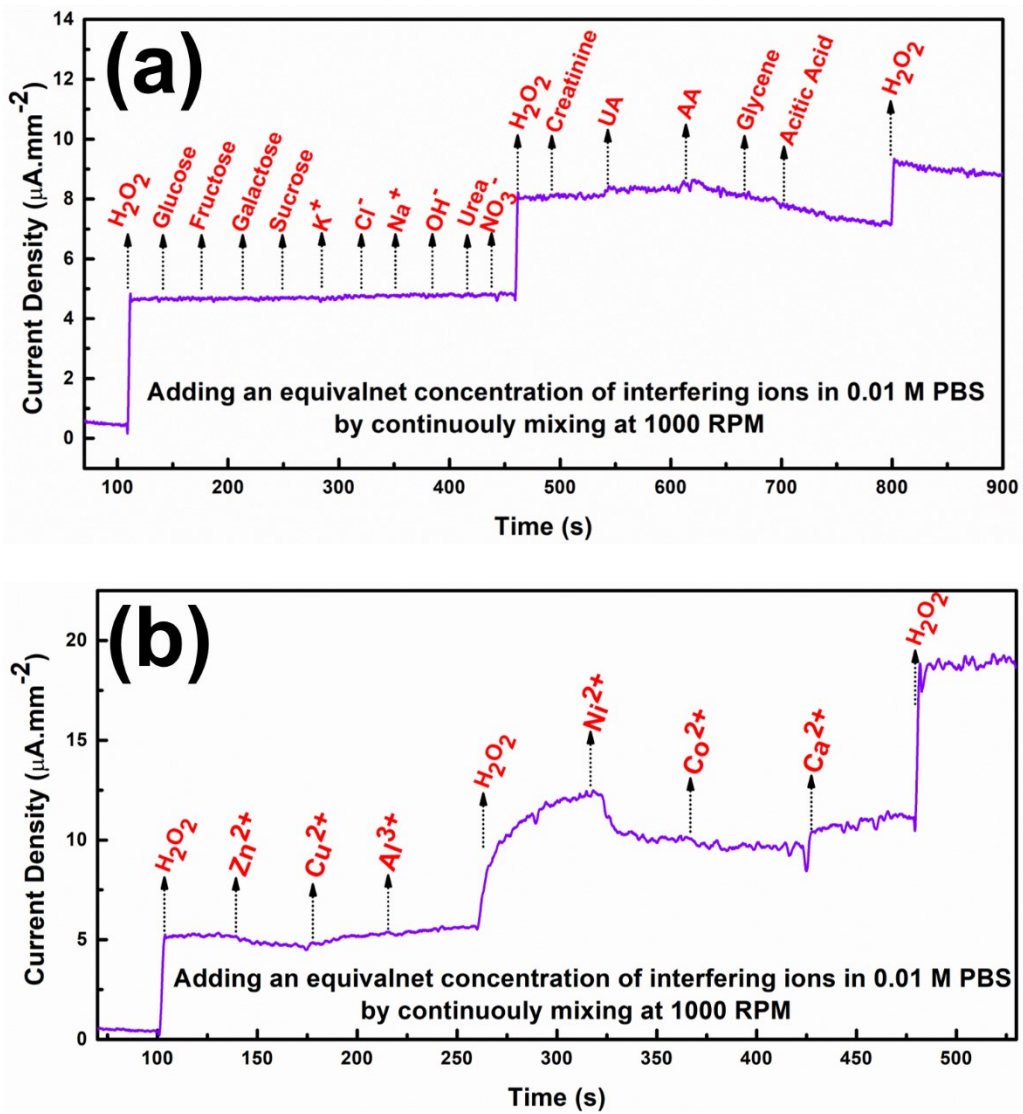

Figure S 15: - Amperometric plots for Interference study of Gr/P-CoHCF-NSPs composite based  $\text{H}_2\text{O}_2$ , (a) For common interfering ions, (b) For metal based interfering ions.

**Table S1:** -Gr/P-CoHCF-NSPs based H<sub>2</sub>O<sub>2</sub> Sensor parameters with recently published work.

| <b>Electrode</b>                           | <b>Sensitivity<br/>(<math>\mu\text{A}\cdot\text{mM}^{-1}\text{ cm}^{-2}</math>)</b> | <b>LOD<br/>(<math>\mu\text{M}</math>)</b> | <b>Linear Range<br/>(mM)</b> | <b>Ref</b> |
|--------------------------------------------|-------------------------------------------------------------------------------------|-------------------------------------------|------------------------------|------------|
| ZnO <sub>3</sub> -CuO <sub>7</sub>         | 1.11                                                                                | 2.4                                       | 0.003 – 0.53                 | [1]        |
| MWCNTs/MnO <sub>2</sub>                    | 13.9                                                                                | 6.97                                      | 0.1 – 20.7                   | [2]        |
| AgNp@GNR                                   | -                                                                                   | 20                                        | 0.05 – 5                     | [3]        |
| Black Berry Ag Nano                        | 51.28                                                                               | 1.06                                      | 0.001 – 0.29                 | [4]        |
| AuNPs/PB/GO                                | 87.6                                                                                | 1.3                                       | 0.03 – 5.4                   | [5]        |
| NiO/Carbon Foam                            | 23.3                                                                                | 0.01                                      | 0.2 – 3.75                   | [6]        |
| MoS <sub>2</sub> /Au-Pd                    | 184                                                                                 | 0.16                                      | 0.0008 - 10                  | [7]        |
| Hollow CuO <sub>x</sub> /NiO <sub>y</sub>  | 271                                                                                 | 0.9                                       | 0.0003 - 9                   | [8]        |
| Au/Cu Nanostructures                       | 133.74                                                                              | 10.93                                     | 0.05 - 10                    | [9]        |
| PDA-CNT/Fe <sub>3</sub> O <sub>4</sub> Cs  | 316.27                                                                              | 6                                         | 0.006 – 2.057                | [10]       |
| C/V <sub>2</sub> O <sub>5</sub> Nanosheets | 204.64                                                                              | 1.7                                       | 0.005 – 1.5                  | [11]       |
| Meso-C/ZnO/GCE                             | 464                                                                                 | 6.25                                      | 50 - 981                     | [12]       |
| Hollow Ni/NiO@C<br>microspheres            | 32.09                                                                               | 0.9                                       | - 80.7                       | [13]       |
| Gr/P-CoHCF-NSPs/GCE                        | 914                                                                                 | 1.0                                       | 0.001 – 5.0                  | This work  |

**Table S2:** - Recovery study of fabricated Gr/P-CoHCF-NSPs composite based H<sub>2</sub>O<sub>2</sub> sensor.

| Concentration of H <sub>2</sub> O <sub>2</sub> (μM) | Output Current Density in PBS (μA.mm <sup>-2</sup> ) | Output Current Density in Lake water (μA.mm <sup>-2</sup> ) | Percentage of recovery (%) | % RCD |
|-----------------------------------------------------|------------------------------------------------------|-------------------------------------------------------------|----------------------------|-------|
| 20                                                  | 0.5111                                               | 0.5237                                                      | 102.4                      | 3.1   |
| 50                                                  | 0.6763                                               | 0.6861                                                      | 101.4                      | 1.5   |
| 100                                                 | 1.0999                                               | 1.0727                                                      | 97.5                       | 2.8   |
| 1000                                                | 6.6300                                               | 6.3775                                                      | 96.2                       | 3.9   |

**References: -**

- [1] S. Daemi, S. Ghasemi, A. Akbar Ashkarran, Electrospun CuO-ZnO nanohybrid: Tuning the nanostructure for improved amperometric detection of hydrogen peroxide as a non-enzymatic sensor, *J. Colloid Interface Sci.* 550 (2019) 180–189. <https://doi.org/10.1016/j.jcis.2019.04.091>.
- [2] M. Dinesh, C. Revathi, Y. Haldorai, R.T. Rajendra Kumar, Birnessite MnO<sub>2</sub> decorated MWCNTs composite as a nonenzymatic hydrogen peroxide sensor, *Chem. Phys. Lett.* 731 (2019) 136612. <https://doi.org/10.1016/j.cplett.2019.136612>.
- [3] V. Stanković, S. Đurđić, M. Ognjanović, J. Mutić, K. Kalcher, D.M. Stanković, A novel nonenzymatic hydrogen peroxide amperometric sensor based on AgNp@GNR nanocomposites modified screen-printed carbon electrode, *J. Electroanal. Chem.* 876 (2020) 2–7. <https://doi.org/10.1016/j.jelechem.2020.114487>.
- [4] M.L.N. Thi, V.T. Pham, Q.B. Bui, P.H. Ai-Le, H.T. Nhac-Vu, Novel nanohybrid of blackberry-like gold structures deposited graphene as a free-standing sensor for effective hydrogen peroxide detection, *J. Solid State Chem.* 286 (2020). <https://doi.org/10.1016/j.jssc.2020.121299>.
- [5] X. Liu, X. Zhang, J. Zheng, One-pot fabrication of AuNPs-Prussian blue-Graphene oxide hybrid nanomaterials for non-enzymatic hydrogen peroxide electrochemical detection, *Microchem. J.* 160 (2021) 105595. <https://doi.org/10.1016/j.microc.2020.105595>.
- [6] M. Liu, M. An, J. Xu, T. Liu, L. Wang, Y. Liu, J. Zhang, Three-dimensional carbon foam supported NiO nanosheets as non-enzymatic electrochemical H<sub>2</sub>O<sub>2</sub> sensors, *Appl. Surf. Sci.* 542 (2021) 148699. <https://doi.org/10.1016/j.apsusc.2020.148699>.
- [7] X. Li, X. Du, Molybdenum disulfide nanosheets supported Au-Pd bimetallic nanoparticles for non-enzymatic electrochemical sensing of hydrogen peroxide and glucose, *Sensors Actuators, B Chem.* 239 (2017) 536–543. <https://doi.org/10.1016/j.snb.2016.08.048>.
- [8] L. Long, X. Liu, L. Chen, D. Li, J. Jia, A hollow CuOx/NiOy nanocomposite for amperometric and non-enzymatic sensing of glucose and hydrogen peroxide, *Microchim. Acta.* 186 (2019) 5–10. <https://doi.org/10.1007/s00604-018-3183-x>.
- [9] A. Ngamaroonchote, Y. Sanguansap, T. Wutikhun, K. Karn-orachai, Highly branched gold–copper nanostructures for non-enzymatic specific detection of glucose and hydrogen peroxide, *Microchim. Acta.* 187 (2020) 1–12. <https://doi.org/10.1007/s00604-020-04542-x>.
- [10] Y. Zhao, D. Huo, L. Jiang, S. Zhou, M. Yang, C. Hou, Synthesis of dopamine-derived N-doped carbon nanotubes/Fe<sub>3</sub>O<sub>4</sub> composites as enhanced electrochemical sensing platforms for hydrogen peroxide detection, *Microchim. Acta.* 187 (2020). <https://doi.org/10.1007/s00604-020-04575-2>.
- [11] S. Chen, C. Wang, X. Lu, Fabrication of two-dimensional carbon/V<sub>2</sub>O<sub>3</sub> composite nanosheets and their application for electrochemical sensing, *Compos. Commun.* 27 (2021) 100842. <https://doi.org/10.1016/j.coco.2021.100842>.
- [12] M.A. Rashed, M. Faisal, F.A. Harraz, M. Jalalah, M. Alsaieri, S.A. Alsareii, A Highly Efficient Nonenzymatic

Hydrogen Peroxide Electrochemical Sensor Using Mesoporous Carbon Doped ZnO Nanocomposite, *J. Electrochem. Soc.* 168 (2021) 027512. <https://doi.org/10.1149/1945-7111/abe44b>.

- [13] X. Ma, K. lai Tang, M. Yang, W. Shi, W. Zhao, Metal–organic framework-derived yolk–shell hollow Ni/NiO@C microspheres for bifunctional non-enzymatic glucose and hydrogen peroxide biosensors, *J. Mater. Sci.* 56 (2021) 442–456. <https://doi.org/10.1007/s10853-020-05236-8>.
